# Supplementary material for: Regulation of the immune tolerance system determines the susceptibility to HLA-mediated abacavir-induced skin toxicity
Source: PubMed Central journal article supplement (PMC8479119; doi:10.1038/s42003-021-02657-2), 2021-09-28
Supplement: 42003_2021_2657_MOESM3_ESM.pdf [file 42003_2021_2657_MOESM3_ESM.pdf]

## **Description of Additional Supplementary Files**

**File name:** Supplementary Data 1

**Description:** All source data underlying the graphs and charts presented in the main figures.
